# Supplementary material for: Comparative Studies of the Uptake and Internalization Pathways of Different Lipid Nano-Systems Intended for Brain Delivery
Source: MDPI journal article supplement (doi:10.3390/pharmaceutics15082082), 2023-08-03
Supplement: s1 [file s1]

# Supplementary Material: Comparative Studies of the Uptake and Internalization Pathways of Different Lipid Nano-systems Intended for Brain Delivery

Ljubica Mihailova, Dushko Shalabaliya, Andreas Zimmer, Nikola Geskovski, Petre Makreski, Marija Petrushevska, Maja Simonoska Crcarevska and Marija Glavash Dodov

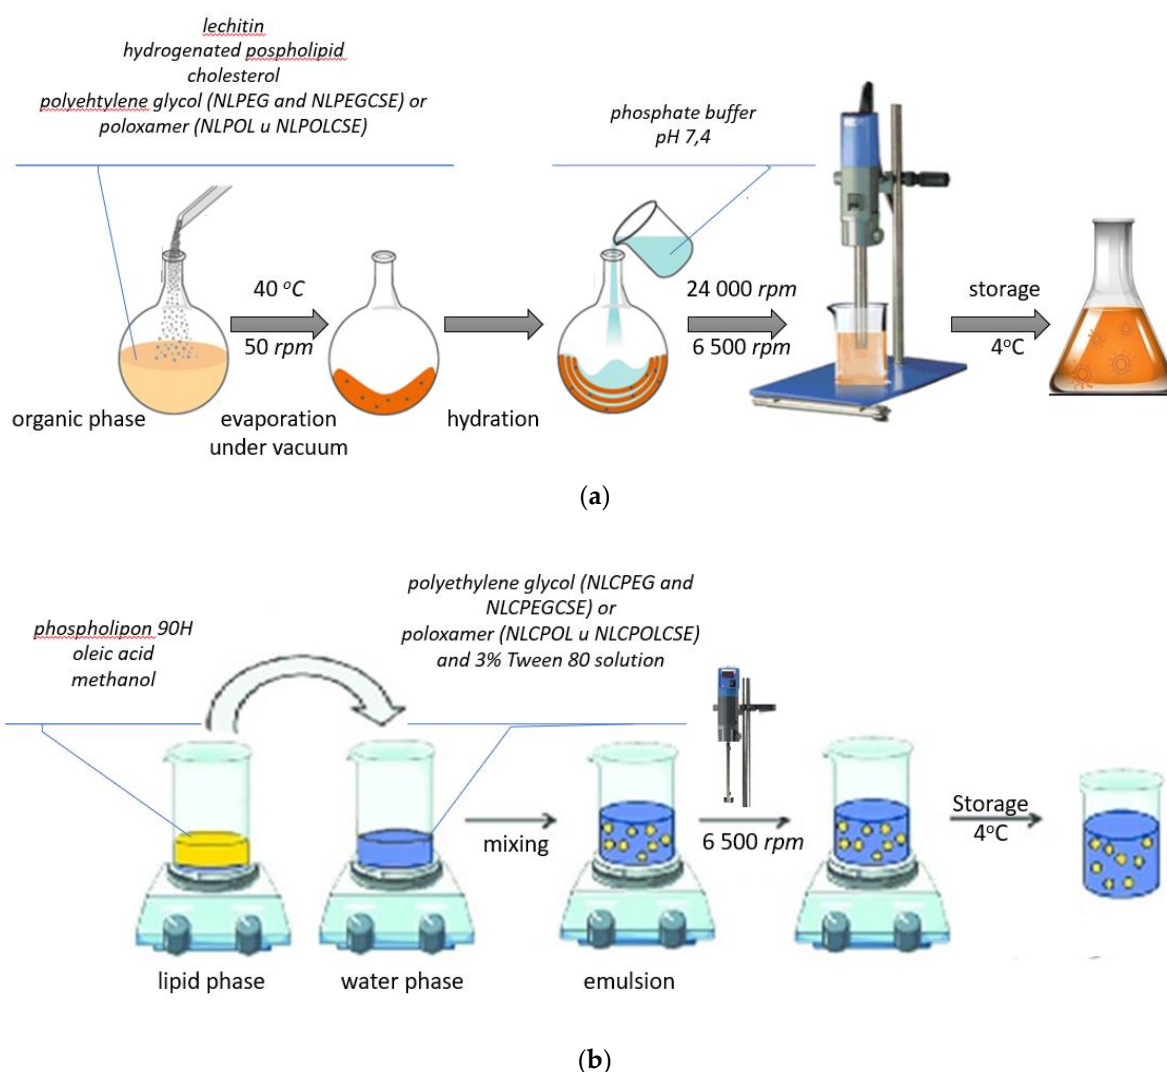

**Figure S1.** Schematic view of the preparation of (a) nanoliposomes and (b) nanostructured lipid carriers.

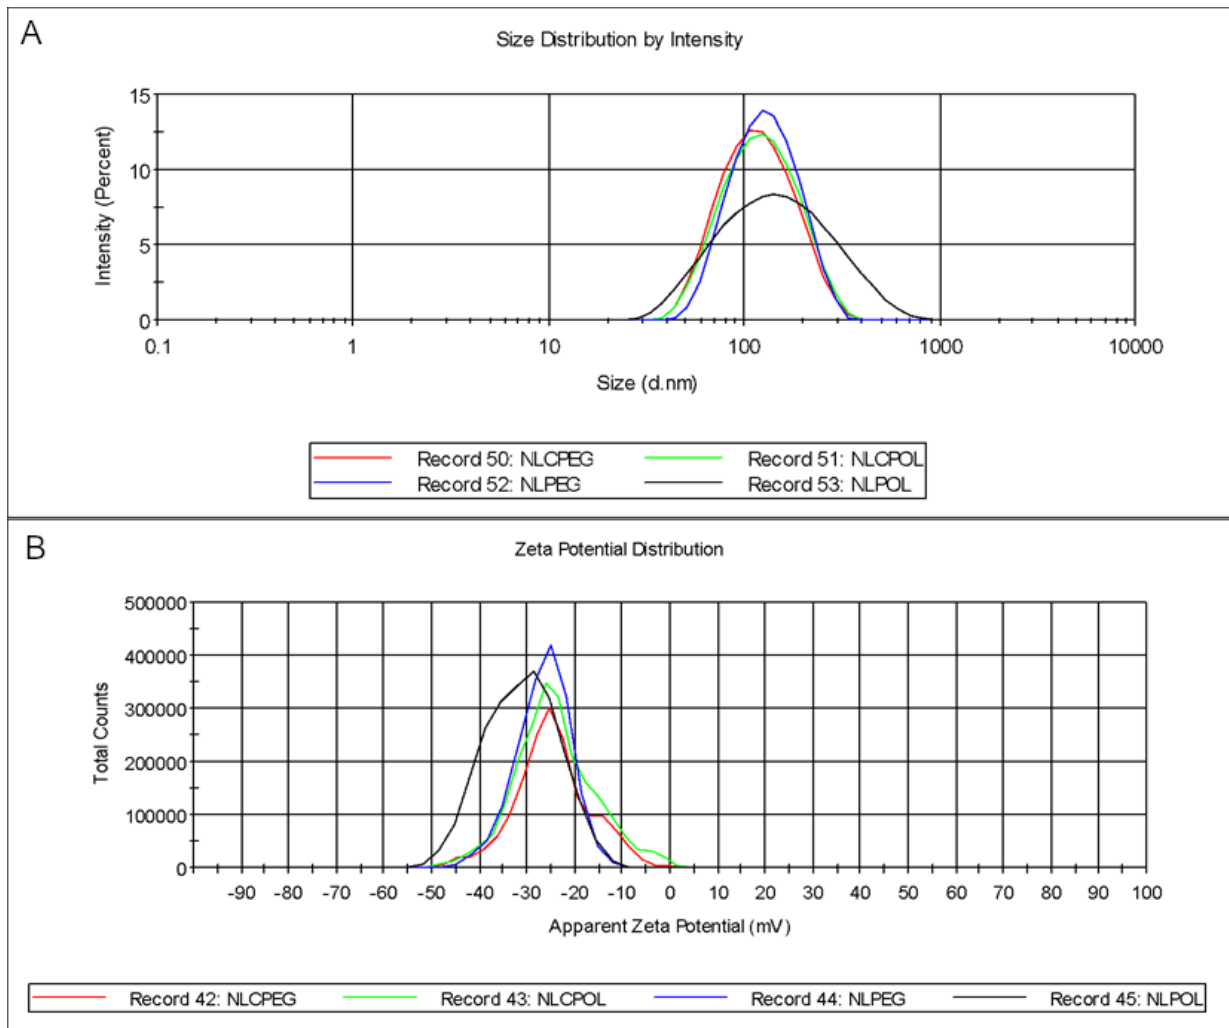

**Figure S2.** Prepared formulations characterized by (A) particle size and particle size distribution; (B) zeta potential.

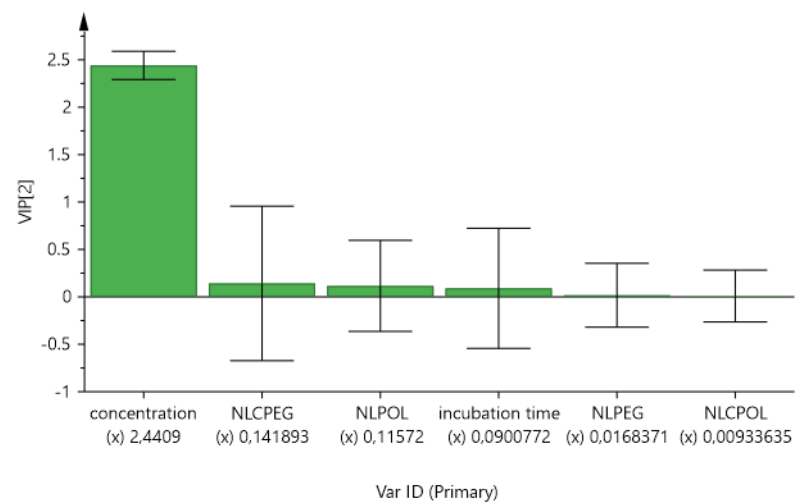

**Figure S3.** VIP plot of significant factors in cell viability experiments.

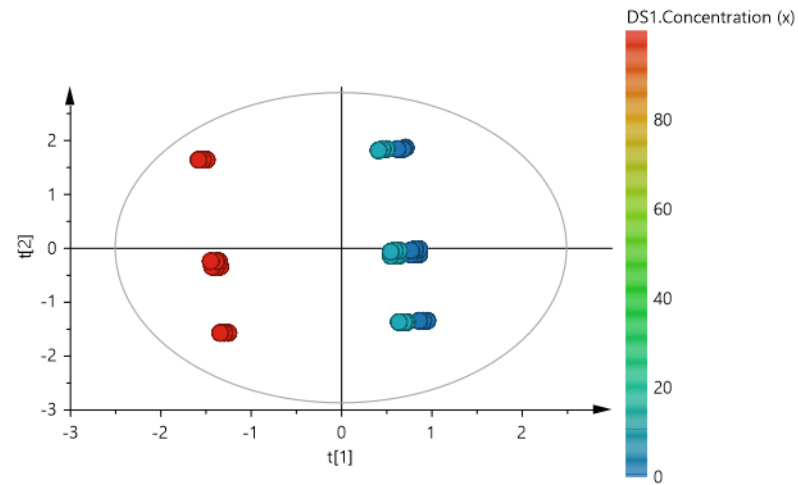

**Figure S4.** Scatter plot of analyzed sample scores colored by incubation time.

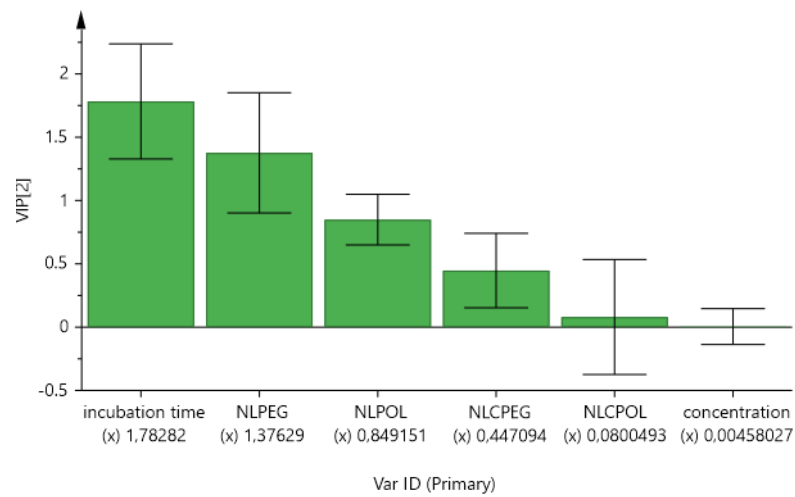

**Figure S5.** VIP plot of significant factors in cell cytotoxicity experiments.

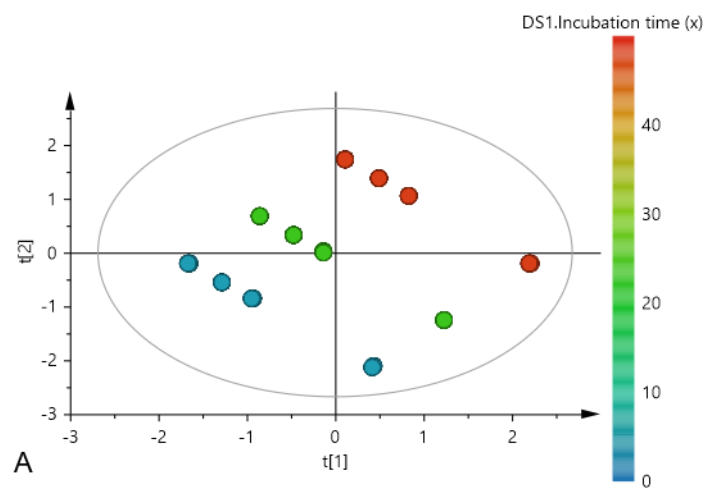

A

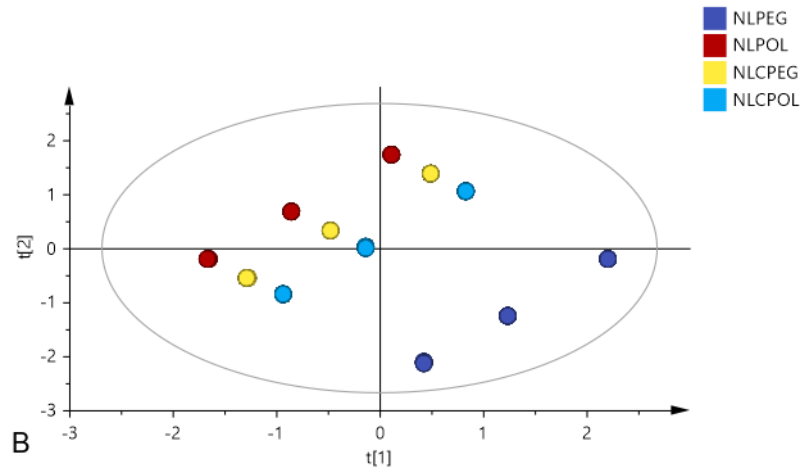

**Figure S6.** Scatter plot of analyzed sample scores colored by: (A) time incubation; (B) formulation.

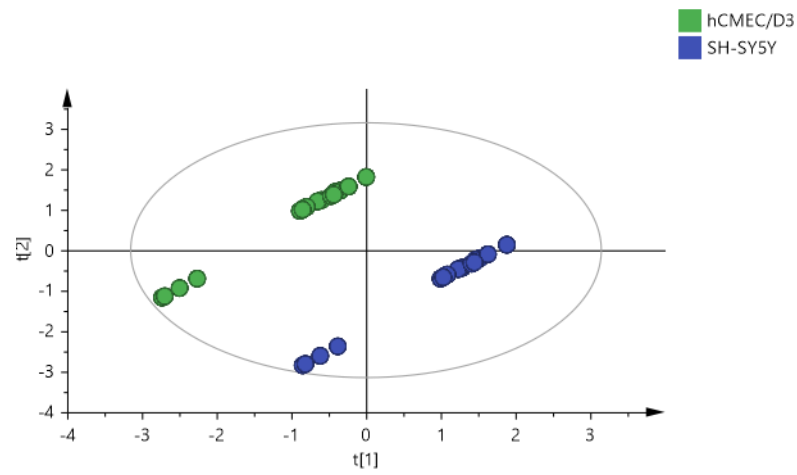

**Figure S7.** Scatter plot of analyzed results colored by cell line type.

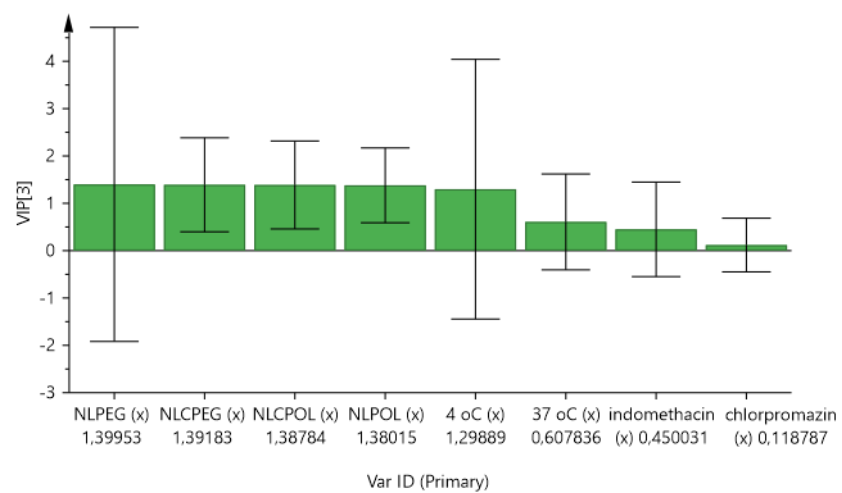

**Figure S8.** VIP plot of significant factors affecting the cell uptake of nano formulations in hCMEC/D3 cell line.

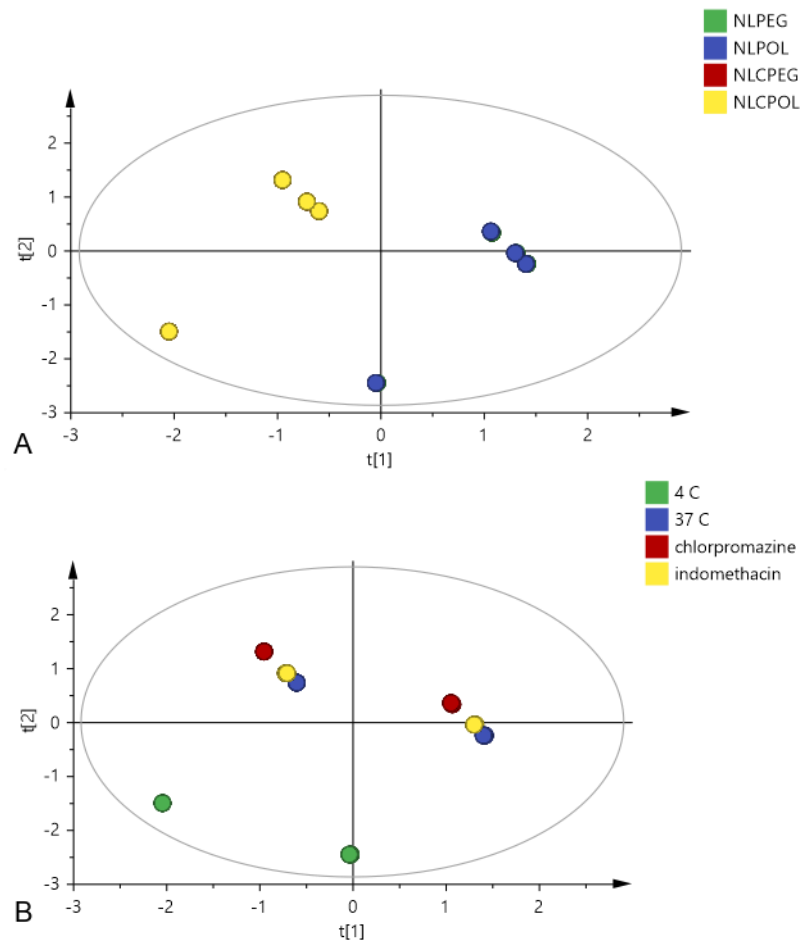

**Figure S9.** Scatter plot of analyzed sample scores on hCMEC/D3 cell line colored by (A) type of formulation; (B) experimental conditions.

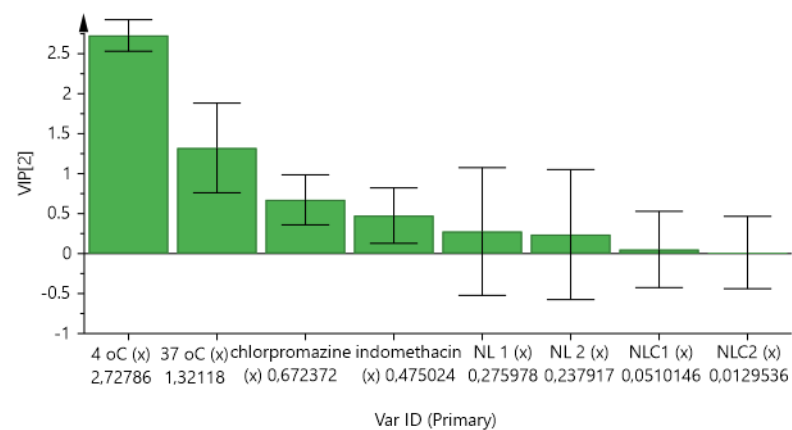

**Figure S10.** VIP plot of significant factors affecting the cell uptake of nano formulations in SH-SY5Y cell line.

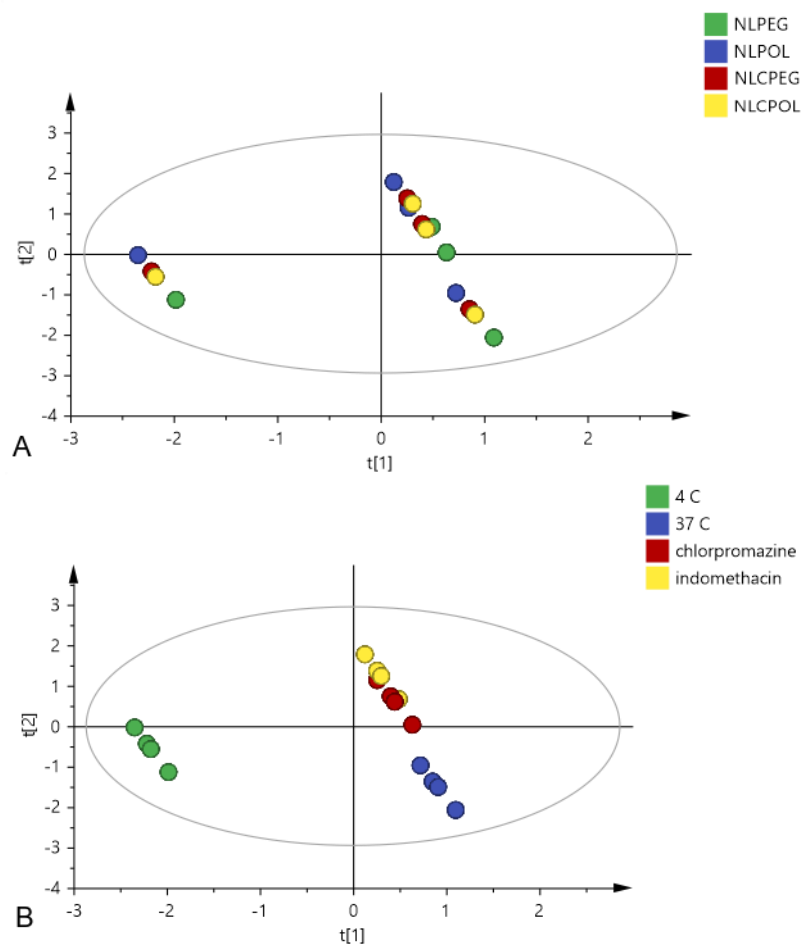

**Figure S11.** Scatter plot of analyzed sample scores on SH-SY5Y cell line colored by (A) type of formulation; (B) experimental conditions.
